# Supplementary material
Source: publisher figshare collection journal article supplement (https://gsapubs.figshare.com/ndownloader/files/22408764)
Supplement: Supplementary file 1 [file 22408764]

## **SUPPLEMENT FILE 6**

Based on along-strike variations in geometry, kinematics and the presence of slip partitioning, the surface rupture in the Sierra domain was divided into six segments and these subdivided into 49 sections, which have an average length of ~1.0 km (Table SF6-1 and Figs. SF6-1 to SF6-3). Note that these short sections are defined as a basis for organizing the fault measurement data, and do not correspond to rupture segments as commonly used for seismic hazard estimation.

In Table SF6-1, we report the orientation and kinematics of each fault section determined from the main datasets presented in this study. For fault section orientations, section strike was determined from the trend of the line connecting the rupture section endpoints, and dip was calculated using Bingham statistics for the rupture sections with multiple measurements of master fault orientation. In general, scarp-forming fractures are oriented at higher dip angles than the master fault along which they propagated. Thus in sections that had no direct measurements of master fault orientation, we report the dip of the shallowest-dipping, scarp-forming fault determined using three-point solutions. Dips determined from these two methods are plotted for each section in Figures SF6-1 to SF6-3. For sections that had neither master fault nor scarp orientation data, we report the dip determined using one of the following conventions: 1) interpolated from the closest measurements found in adjacent fault sections, 2) extrapolated dip from the nearest rupture section, or 3) assumed rupture section dip based on structural context and known along-strike characteristics of the fault zone. The method for determining rupture section dip is marked in the “Dip Source” field in Table SF6-1. The average vertical and lateral slip components of each section was calculated by dividing the area of the smoothed slip

envelope by the section length. Heave was calculated using the rupture section dip and the net vertical displacement averaged over each section. Total slip is the vector sum of heave, lateral and vertical components of slip. Finally, fault section kinematics were derived using fault section orientations and the lateral and heave components of slip.

### **Laguna Salada Segment**

Within the Laguna Salada segment, we defined six sections based on changes in kinematics and geometry (Fig. SF6-1). Sections 1 and 2 form the southern tine of the prominent splay observed near the edge of the Delta domain with minor northeast-down vertical displacements (Fig. SF6-1). The northern tine is divided in three different splays (sections 3–5) based on left-stepping discontinuities in the surface trace of the rupture, each of which also accommodated minor northeast-down vertical displacements. Section 6 is marked by a change in polarity of vertical slip to the southwest and extends to the intersection with the Pescadores fault. Dips reported in Table SF6-1 for sections 1 and 2 were determined using three-point solutions of scarp-forming faults. For sections 3–6, rupture section dip reported is based on the assumption that the Laguna Salada fault has a subvertical inclination within this segment.

### **Pescadores Segment**

The Pescadores rupture segment shows very little along-strike variations in both orientation and kinematics, however, we identified six sections based on subtle changes in strike as well as changes in distribution of antithetic southwest-side down vertical slip (Fig. SF6-1). All rupture sections within the Pescadores segment dip  $>65^\circ$  towards the northeast. For most fault sections, with the exception of section 11, dips reported in Table SF6-1 were determined from measurements of scarp-forming faults and/or master faults.

For section 11, we report the dip interpolated from the nearest measurements found in sections 10 and 12.

### **Puerta Accommodation Zone**

EMC rupture through the Puerta accommodation zone was broadly distributed along multiple faults, including several unnamed faults and the Cascabel and Borrego faults (Fig. SF6-2). Due to the paucity of kinematic measurements in the field and the complex distribution of surface rupture between the Pescadores rupture segment and the Cascabel fault, we only recognize one section (section 13; Fig. SF6-2). This section is located ~6 km from the northern limit of the Pescadores rupture segment, dips  $\sim 72^\circ$  and contains a single kinematic transect measurement (Fig. SF6-2). Along the northern portion of the accommodation zone coseismic slip is distributed between the closely spaced and subparallel Cascabel and Borrego faults, an additional four fault sections were identified based on along-strike changes in fault orientation (sections 14 to 17; Fig. SF6-2). A single section was defined along the Cascabel fault due to its relatively straight surface trace and uniformly steep inclination, whereas, along the adjacent Borrego fault, three fault sections were recognized based on  $>15^\circ$  changes in strike along its length.

### **Borrego Segment**

The Borrego rupture segment is divided into three kinematic sections (sections 18–20) defined by changes in strike (Fig. SF6-2 and Table SF6-1). These sections show systematic differences in the ratio of lateral to vertical slip measured across the scarp array. Dextral slip is maximized on section 19, which has the most westerly strike, and is minimized on section 20, which has a NNE strike and accommodates a strong sinistral component of slip (Fig. SF6-2 and Table SF6-1). Dips reported in Table SF6-1 were

determined using the shallowest dipping scarp-forming faults within each section, which commonly had moderate inclinations. Due to the moderate inclinations of these fault sections, the heave component derived for these section are an order of magnitude greater than those derived for all fault sections to the south.

### **Paso Inferior Accommodation Zone**

The Paso Inferior accommodation zone contains the northernmost Borrego fault, an east-dipping detachment and two west-dipping faults, from which we identified 13 sections mostly based on changes in strike as well as discontinuities in the rupture trace defined by stepovers (Fig. SF6-3). The northernmost west-dipping fault was defined as a single section (section 38) due to its relatively short length.

### **Paso Superior Segment**

The Paso Superior rupture segment is divided into 11 kinematic sections defined by changes in either fault strike (sections 39–45), a left-stepping transfer zone (section 46) or at large changes in dip due to the ramp–flat transitions of the Paso Superior detachment (sections 47–49). For sections that dip  $<45^\circ$  and that accommodated significant amounts of vertical displacement, the heave component of the total coseismic slip vector is generally much greater than the vertical and lateral slip components (Table SF6-1). Section 48 represents the northernmost fault ramp where the Paso Superior detachment dips  $\sim 55^\circ$ , and is where the largest amount of dextral coseismic slip was measured in the Paso Superior segment.

## **TABLES**

**Table SF6-1.** Table containing geometry and EMC rupture kinematics determined for the 49 fault sections identified in the Sierra domain of the EMC rupture. Longitude and latitude mark midpoint locations to fault sections.

## **FIGURE CAPTIONS**

**Figure SF6-1.** Geologic map of the southern Sierra Cucapah showing schematic rupture traces (yellow lines), and the fault section boundaries and labels, geometry (ball and bar symbols) and EMC rupture kinematics (shaded envelopes). Fault section dip values are only shown for sections containing measurements of master fault plane and/or scarp-forming faults. See Figure 11 for additional information.

**Figure SF6-2.** Geologic map of the central Sierra Cucapah showing schematic rupture traces (yellow lines), and the fault section boundaries and labels, geometry (ball and bar symbols) and EMC rupture kinematics (shaded envelopes). Fault section dip values are only shown for sections containing measurements of master fault plane and/or scarp-forming faults. See Figure 14 for additional information.

**Figure SF6-3.** Geologic map of the northern Sierra Cucapah showing schematic rupture traces (yellow lines), and the fault section boundaries and labels, geometry (ball and bar symbols) and EMC rupture kinematics (shaded envelopes). Fault section dip values are only shown for sections containing measurements of master fault plane and/or scarp-forming faults. See Figure 18 for additional information.

**Table SF6-1.** Table of fault section geometry and EMC rupture kinematics.

| Longitude   | Latitude  | Length (m) | Domain | Segment       | Fault              | Section | Strike | Dip | Dip Source           | Lateral (cm) | Vertical (cm) | Heave (cm) | Total (cm) | Slip Azimuth | Slip Plunge | Slip Rate | Max. Instant. Extension Azimuth |
|-------------|-----------|------------|--------|---------------|--------------------|---------|--------|-----|----------------------|--------------|---------------|------------|------------|--------------|-------------|-----------|---------------------------------|
| -115.336473 | 32.271493 | 1981       | Sierra | Laguna Salada | LS south line      | 1       | 314    | 81  | scarp                | 21           | 3             | 0          | 21         | 133          | 8           | 172       | 269                             |
| -115.346684 | 32.281777 | 1167       | Sierra | Laguna Salada | LS south line      | 2       | 326    | 73  | scarp                | 45           | 28            | 9          | 54         | 135          | 31          | 147       | 93                              |
| -115.331692 | 32.283651 | 1262       | Sierra | Laguna Salada | LS north line      | 3       | 306    | 85  | assumed <sup>1</sup> | 54           | 3             | 0          | 54         | 126          | 3           | 177       | 261                             |
| -115.341333 | 32.287809 | 1862       | Sierra | Laguna Salada | LS north line      | 4       | 295    | 85  | assumed <sup>1</sup> | 19           | 20            | 2          | 28         | 110          | 47          | 133       | 58                              |
| -115.353071 | 32.288910 | 842        | Sierra | Laguna Salada | Laguna Salada      | 5       | 291    | 85  | assumed <sup>1</sup> | 128          | 18            | 2          | 129        | 110          | 8           | 172       | 65                              |
| -115.374864 | 32.299136 | 2845       | Sierra | Laguna Salada | Laguna Salada      | 6       | 122    | 85  | assumed <sup>1</sup> | 128          | 31            | 3          | 132        | 301          | 14          | 166       | 256                             |
| -115.393149 | 32.309883 | 1370       | Sierra | Pescadores    | Pescadores         | 7       | 307    | 85  | fault                | 101          | 30            | 3          | 105        | 125          | 17          | 163       | 80                              |
| -115.404150 | 32.317806 | 1392       | Sierra | Pescadores    | Pescadores         | 8       | 302    | 75  | scarp                | 185          | 42            | 11         | 190        | 119          | 13          | 167       | 256                             |
| -115.432191 | 32.338476 | 5668       | Sierra | Pescadores    | Pescadores         | 9       | 315    | 76  | scarp                | 189          | 82            | 20         | 207        | 129          | 23          | 156       | 86                              |
| -115.457978 | 32.361010 | 1321       | Sierra | Pescadores    | Pescadores         | 10      | 310    | 74  | scarp                | 276          | 69            | 20         | 285        | 126          | 14          | 165       | 263                             |
| -115.467630 | 32.369443 | 1301       | Sierra | Pescadores    | Pescadores         | 11      | 324    | 75  | assumed <sup>2</sup> | 239          | 66            | 18         | 249        | 140          | 15          | 164       | 277                             |
| -115.486009 | 32.386726 | 3926       | Sierra | Pescadores    | Pescadores         | 12      | 310    | 68  | scarp                | 235          | 79            | 32         | 250        | 122          | 18          | 160       | 261                             |
| -115.567290 | 32.436601 | 826        | Sierra | Puerta        | Unnamed Fault      | 13      | 335    | 72  | fault                | 57           | 91            | 30         | 111        | 128          | 55          | 121       | 88                              |
| -115.589833 | 32.449393 | 3279       | Sierra | Puerta        | Cascabel           | 14      | 321    | 77  | fault                | 144          | 79            | 18         | 165        | 134          | 28          | 151       | 90                              |
| -115.597439 | 32.448969 | 1340       | Sierra | Puerta        | Borrego            | 15      | 324    | 62  | scarp                | 0            | 69            | 37         | 78         | 54           | 62          | 90        | 54                              |
| -115.601844 | 32.455587 | 361        | Sierra | Puerta        | Borrego            | 16      | 341    | 56  | scarp                | 0            | 65            | 44         | 78         | 71           | 56          | 90        | 71                              |
| -115.603980 | 32.459057 | 544        | Sierra | Puerta        | Borrego            | 17      | 322    | 69  | scarp                | 33           | 30            | 12         | 46         | 123          | 40          | 136       | 84                              |
| -115.610448 | 32.462125 | 1324       | Sierra | Borrego       | Borrego            | 18      | 330    | 41  | scarp                | 74           | 153           | 177        | 245        | 83           | 39          | 108       | 252                             |
| -115.618268 | 32.470909 | 1236       | Sierra | Borrego       | Borrego            | 19      | 317    | 40  | scarp                | 157          | 151           | 179        | 282        | 88           | 32          | 124       | 250                             |
| -115.621902 | 32.478259 | 704        | Sierra | Borrego       | Borrego            | 20      | 15     | 47  | scarp                | 47           | 127           | 118        | 180        | 84           | 45          | 75        | 95                              |
| -115.622446 | 32.484217 | 709        | Sierra | Paso Inferior | Borrego            | 21      | 335    | 84  | scarp                | 190          | 96            | 10         | 213        | 152          | 27          | 153       | 106                             |
| -115.628565 | 32.490841 | 1238       | Sierra | Paso Inferior | Borrego            | 22      | 316    | 80  | fault                | 254          | 117           | 21         | 280        | 131          | 25          | 155       | 86                              |
| -115.635238 | 32.497748 | 762        | Sierra | Paso Inferior | Borrego            | 23      | 333    | 75  | assumed <sup>3</sup> | 54           | 47            | 13         | 73         | 140          | 40          | 138       | 96                              |
| -115.636988 | 32.506186 | 1159       | Sierra | Paso Inferior | Borrego            | 24      | 355    | 75  | assumed <sup>3</sup> | 158          | 46            | 12         | 165        | 170          | 16          | 163       | 127                             |
| -115.636122 | 32.485068 | 615        | Sierra | Paso Inferior | Unnamed Detachment | 25      | 298    | 45  | fault                | 78           | 3             | 3          | 78         | 116          | 2           | 177       | 261                             |
| -115.641037 | 32.487893 | 517        | Sierra | Paso Inferior | Unnamed Detachment | 26      | 317    | 45  | assumed <sup>3</sup> | 61           | 1             | 1          | 61         | 136          | 1           | 179       | 281                             |
| -115.645260 | 32.490874 | 554        | Sierra | Paso Inferior | Unnamed Detachment | 27      | 304    | 45  | assumed <sup>3</sup> | 146          | 31            | 31         | 152        | 112          | 12          | 163       | 260                             |
| -115.650294 | 32.492119 | 317        | Sierra | Paso Inferior | Unnamed Detachment | 28      | 329    | 45  | assumed <sup>3</sup> | 54           | 41            | 41         | 79         | 112          | 31          | 133       | 268                             |
| -115.651226 | 32.495353 | 412        | Sierra | Paso Inferior | Unnamed Detachment | 29      | 331    | 45  | assumed <sup>3</sup> | 5            | 33            | 33         | 47         | 69           | 45          | 96        | 65                              |
| -115.655500 | 32.497793 | 447        | Sierra | Paso Inferior | Unnamed Detachment | 30      | 328    | 45  | assumed <sup>3</sup> | 22           | 35            | 35         | 54         | 90           | 40          | 114       | 254                             |
| -115.656747 | 32.502921 | 727        | Sierra | Paso Inferior | Unnamed Detachment | 31      | 347    | 45  | assumed <sup>3</sup> | 3            | 19            | 9          | 21         | 95           | 64          | 98        | 83                              |
| -115.649023 | 32.503125 | 433        | Sierra | Paso Inferior | Unnamed Fault      | 32      | 164    | 65  | assumed <sup>3</sup> | 2            | 30            | 14         | 33         | 261          | 65          | 93        | 256                             |
| -115.649853 | 32.507630 | 590        | Sierra | Paso Inferior | Unnamed Fault      | 33      | 178    | 65  | assumed <sup>3</sup> | 0            | 77            | 36         | 85         | 268          | 65          | 90        | 268                             |
| -115.651158 | 32.512993 | 654        | Sierra | Paso Inferior | Unnamed Fault      | 34      | 153    | 65  | assumed <sup>3</sup> | 0            | 104           | 49         | 115        | 243          | 65          | 90        | 243                             |
| -115.656136 | 32.517521 | 751        | Sierra | Paso Inferior | Unnamed Fault      | 35      | 131    | 65  | assumed <sup>3</sup> | 4            | 37            | 17         | 41         | 235          | 64          | 96        | 226                             |
| -115.659594 | 32.523341 | 779        | Sierra | Paso Inferior | Unnamed Fault      | 36      | 170    | 58  | scarp                | 0            | 54            | 34         | 64         | 260          | 58          | 90        | 260                             |
| -115.661837 | 32.530938 | 971        | Sierra | Paso Inferior | Unnamed Fault      | 37      | 161    | 62  | scarp                | 4            | 13            | 7          | 15         | 281          | 59          | 105       | 262                             |
| -115.670105 | 32.524291 | 1568       | Sierra | Paso Inferior | Unnamed Fault      | 38      | 168    | 65  | assumed <sup>3</sup> | 6            | 54            | 25         | 60         | 272          | 64          | 96        | 263                             |
| -115.684467 | 32.534098 | 654        | Sierra | Paso Superior | Paso Superior      | 39      | 342    | 40  | assumed <sup>3</sup> | 87           | 125           | 149        | 213        | 102          | 36          | 114       | 269                             |
| -115.687301 | 32.538049 | 407        | Sierra | Paso Superior | Paso Superior      | 40      | 333    | 40  | assumed <sup>3</sup> | 29           | 93            | 111        | 148        | 77           | 39          | 101       | 251                             |
| -115.689159 | 32.543011 | 770        | Sierra | Paso Superior | Paso Superior      | 41      | 336    | 38  | scarp                | 22           | 203           | 260        | 331        | 71           | 38          | 94        | 249                             |
| -115.691132 | 32.547321 | 261        | Sierra | Paso Superior | Paso Superior      | 42      | 351    | 37  | scarp                | 44           | 139           | 185        | 236        | 95           | 36          | 101       | 269                             |
| -115.694452 | 32.552892 | 1169       | Sierra | Paso Superior | Paso Superior      | 43      | 324    | 32  | fault                | 96           | 104           | 166        | 218        | 84           | 28          | 116       | 253                             |
| -115.703499 | 32.561761 | 1544       | Sierra | Paso Superior | Paso Superior      | 44      | 321    | 35  | fault                | 42           | 82            | 117        | 149        | 70           | 33          | 106       | 242                             |
| -115.713817 | 32.570997 | 1337       | Sierra | Paso Superior | Paso Superior      | 45      | 313    | 32  | fault                | 100          | 24            | 38         | 110        | 112          | 12          | 156       | 269                             |
| -115.719326 | 32.572418 | 979        | Sierra | Paso Superior | Paso Superior      | 46      | 328    | 21  | fault                | 76           | 20            | 51         | 94         | 114          | 12          | 144       | 280                             |
| -115.724374 | 32.580247 | 1002       | Sierra | Paso Superior | Paso Superior      | 47      | 350    | 20  | fault                | 112          | 80            | 218        | 258        | 107          | 18          | 116       | 279                             |
| -115.728026 | 32.590010 | 1439       | Sierra | Paso Superior | Paso Superior      | 48      | 332    | 55  | fault                | 165          | 100           | 70         | 205        | 129          | 29          | 144       | 276                             |
| -115.733230 | 32.597316 | 385        | Sierra | Paso Superior | Paso Superior      | 49      | 327    | 37  | fault                | 24           | 46            | 61         | 80         | 78           | 35          | 107       | 249                             |

<sup>1</sup> Dip based on assumption that LSF is a subvertical fault.

<sup>2</sup> Dip is interpolated using nearest observations from adjacent segments

<sup>3</sup> Dip is extrapolated using observations from nearest segments.



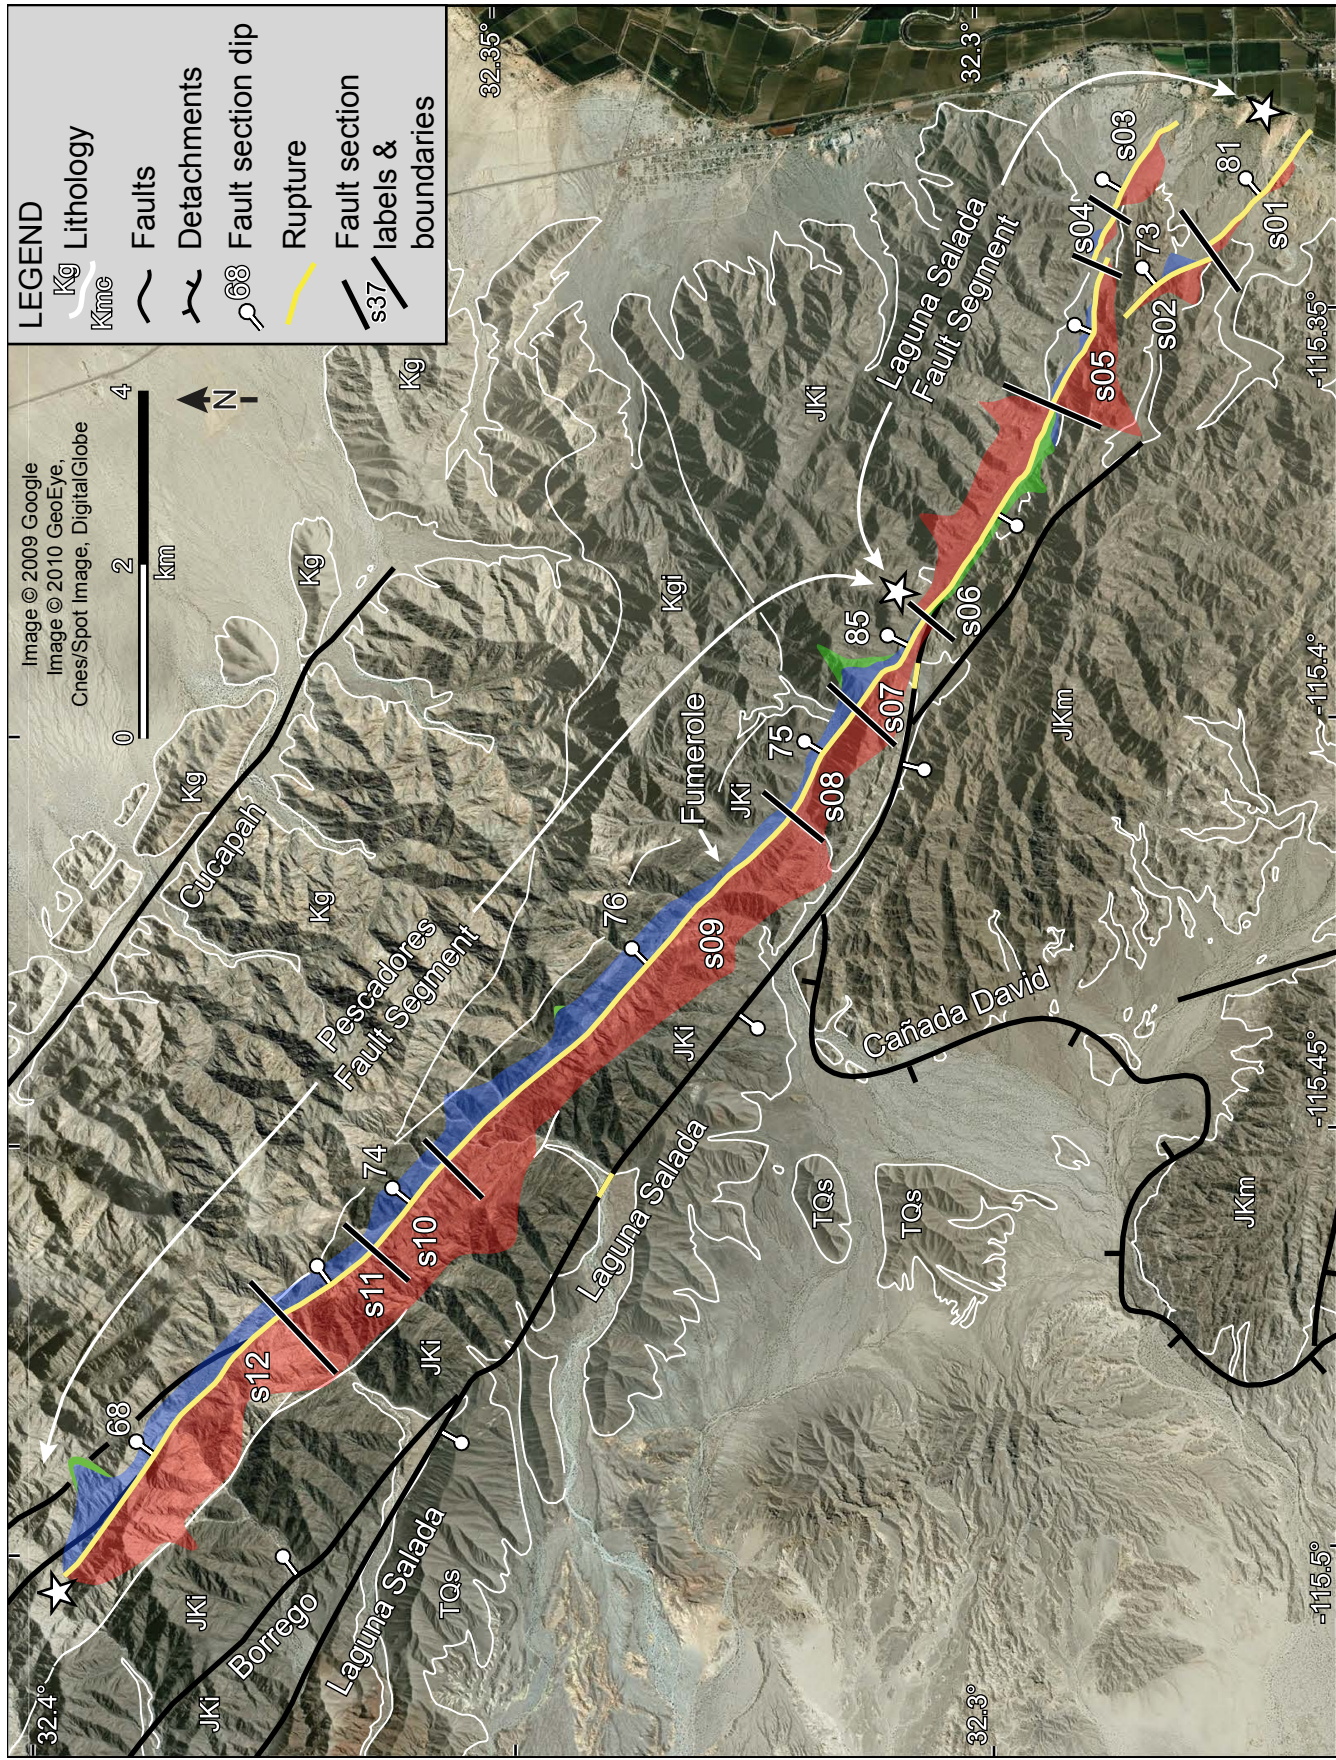

Figure SF6-1



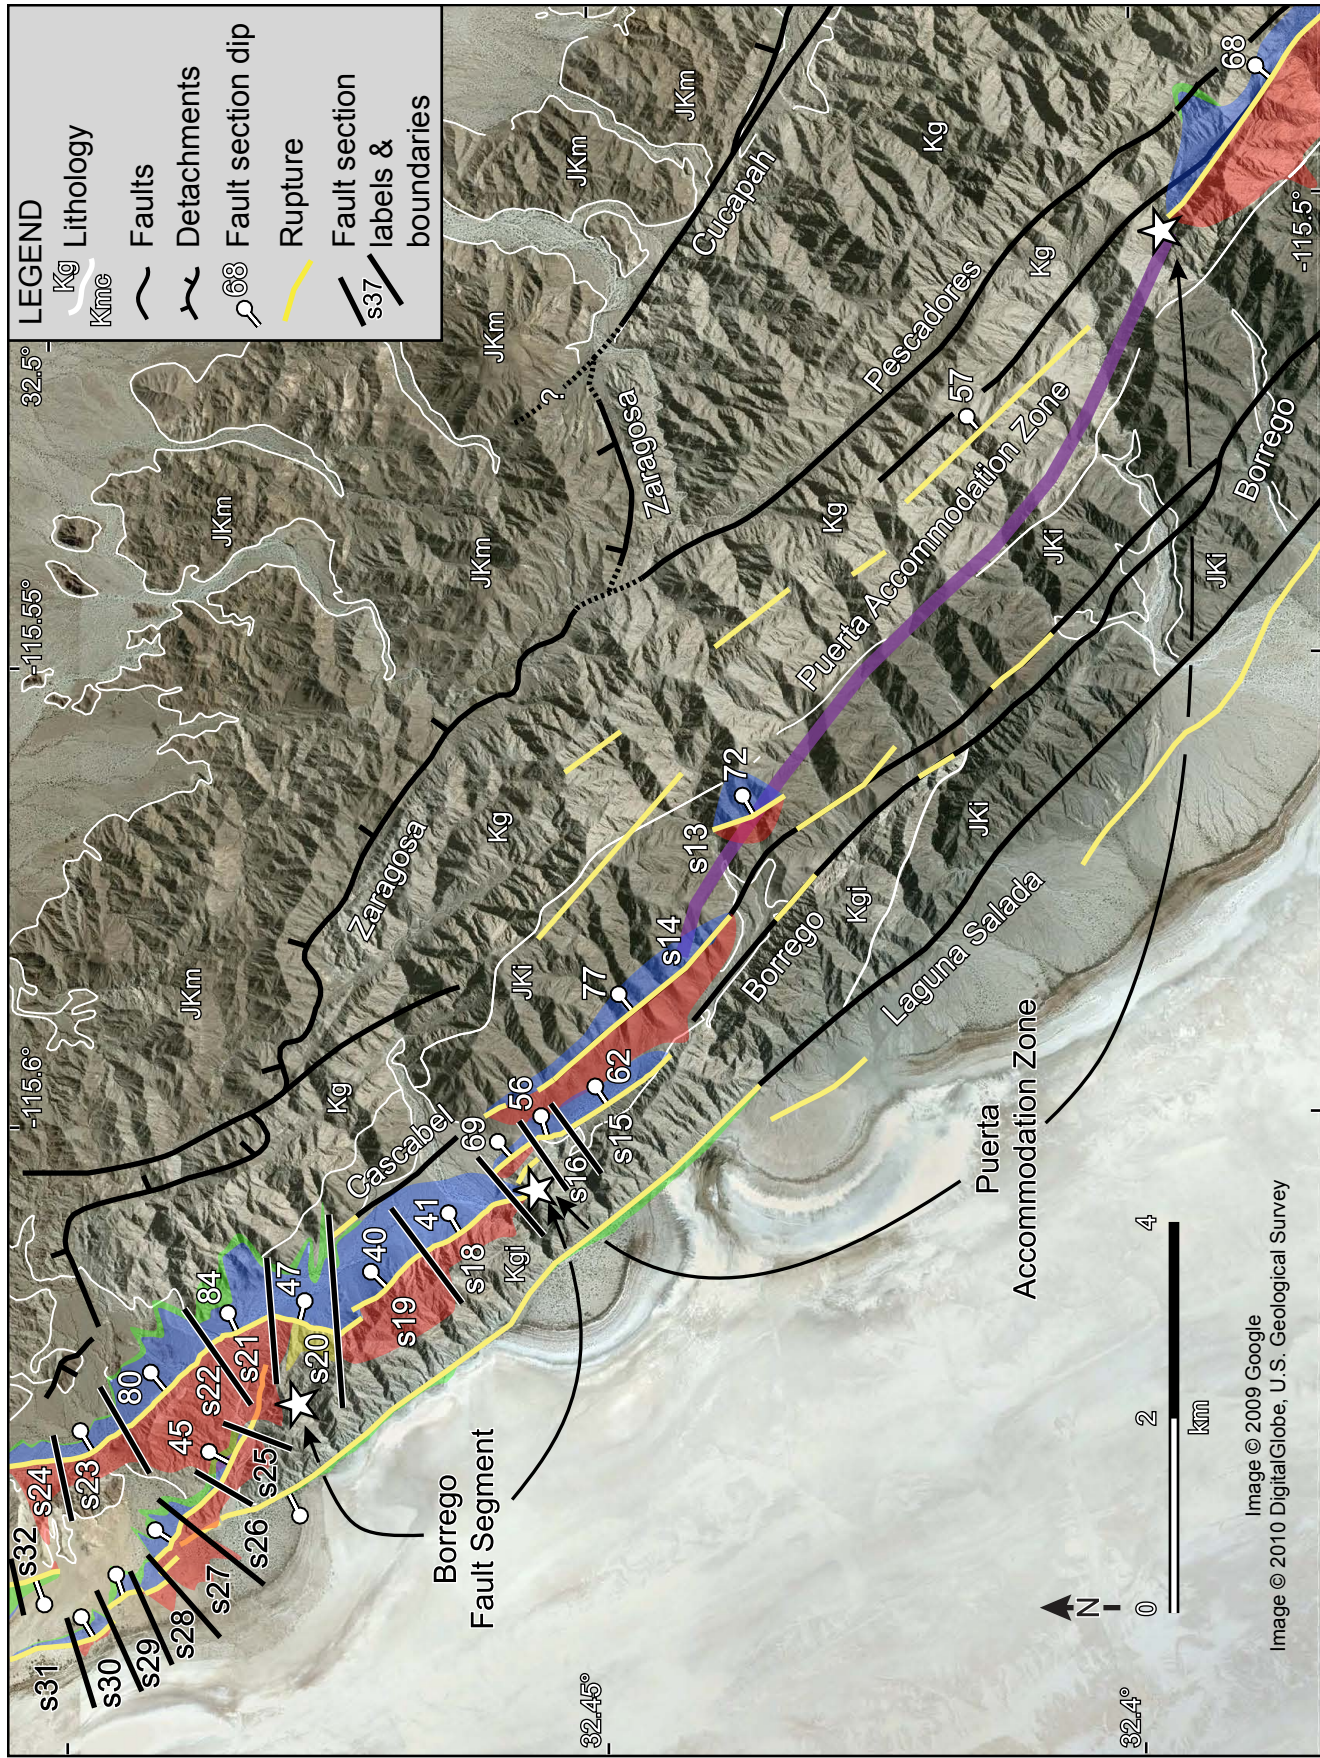

Figure SF6-2



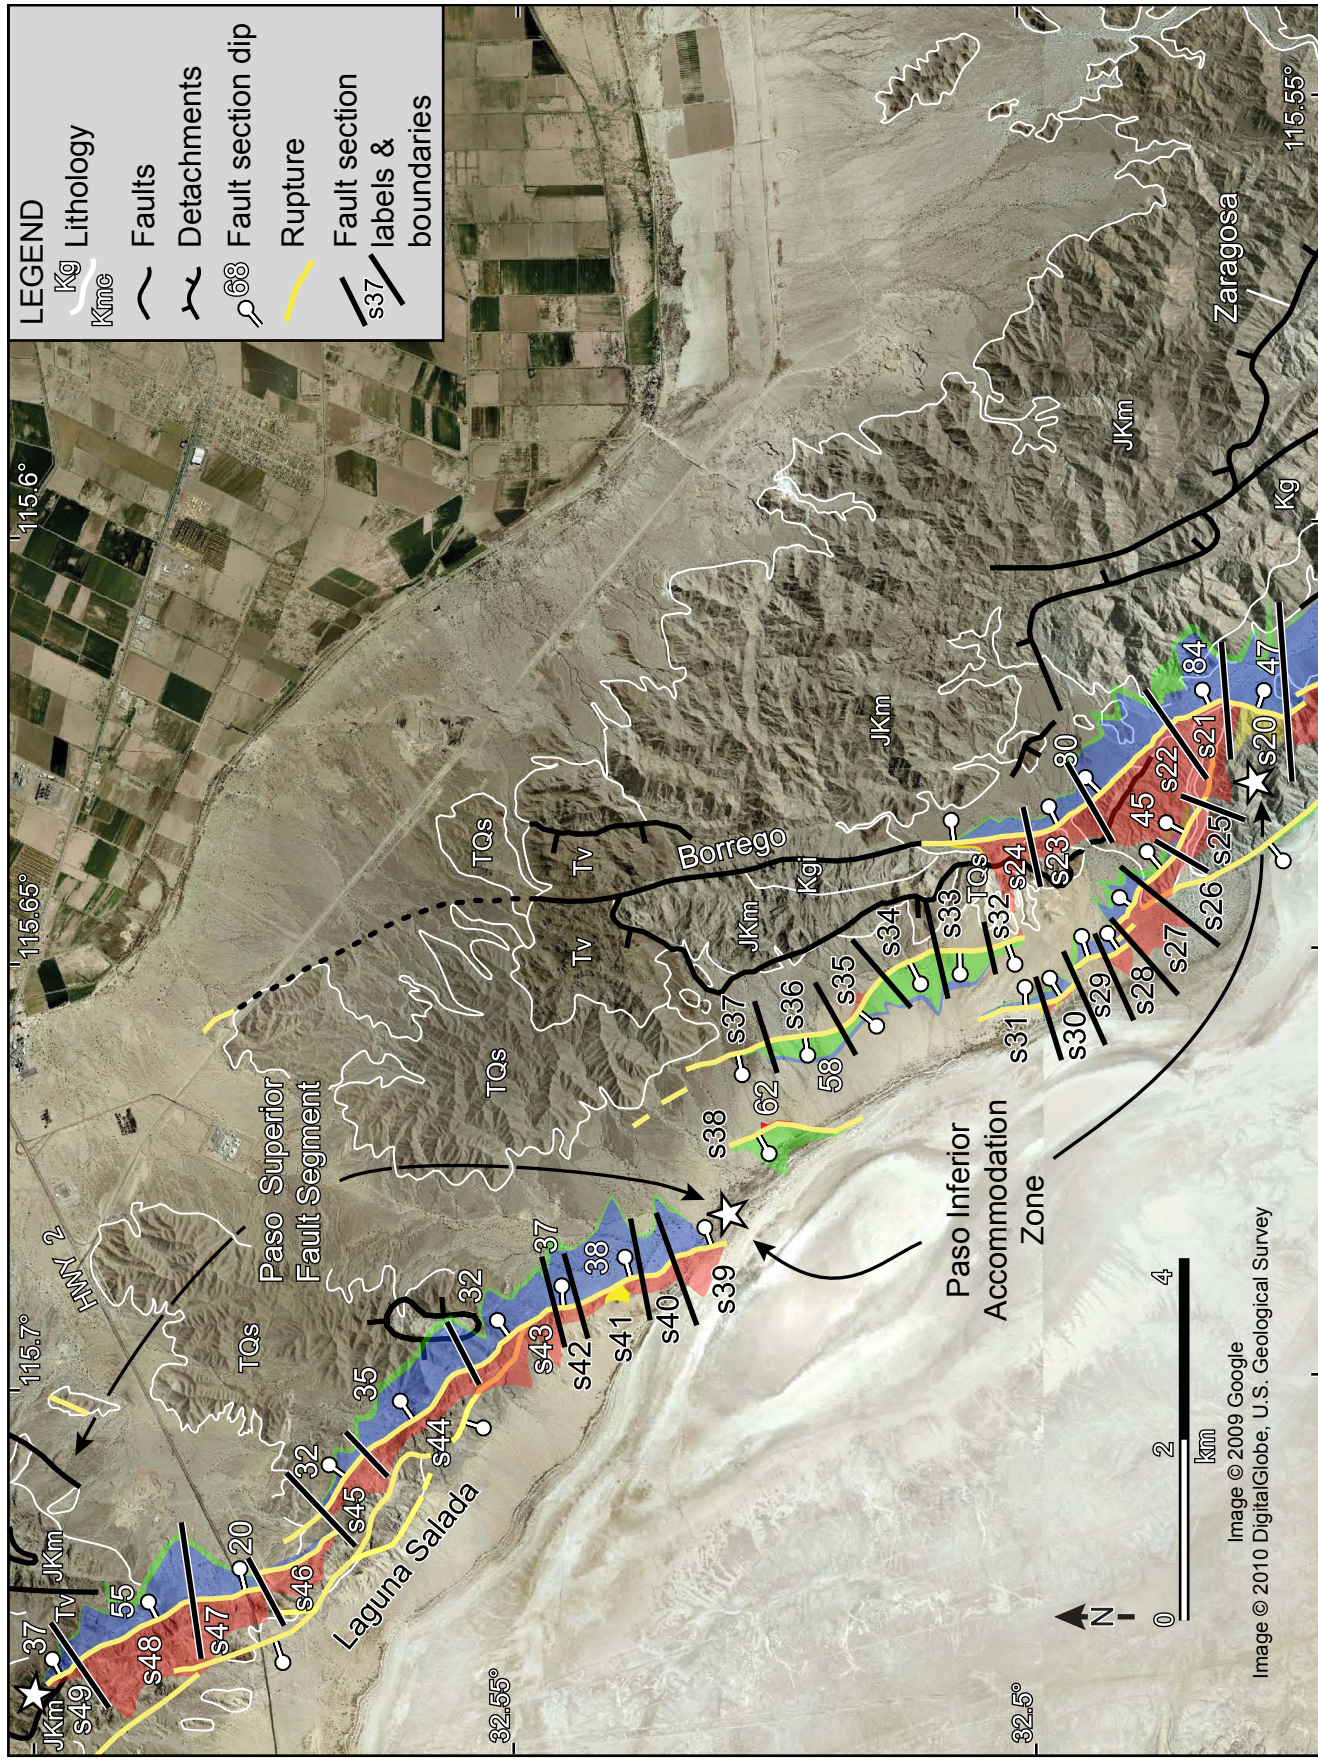

Figure SF6-3
